# Transcranial focused ultrasound-mediated neurochemical and functional connectivity changes in deep cortical regions in humans

Siti N. Yaakub<sup>1,2</sup>, Tristan A. White<sup>1,2</sup>, Jamie Roberts<sup>3</sup>, Lennart Verhagen<sup>4</sup>,  
Charlotte J. Stagg<sup>5,6</sup>, Stephen Hall<sup>1,2</sup>, Elsa F. Fouragnan<sup>1,2\*</sup>

<sup>1</sup>School of Psychology, Faculty of Health, University of Plymouth,  
Plymouth, United Kingdom

<sup>2</sup>Brain Research and Imaging Centre, Faculty of Health, University of Plymouth,  
Plymouth, United Kingdom

<sup>3</sup>Department of Clinical Measurement and Innovation,  
University Hospitals Plymouth NHS Trust, Plymouth, United Kingdom

<sup>4</sup>Donders Institute for Brain, Cognition and Behaviour,  
Radboud University Nijmegen, Nijmegen, Netherlands

<sup>5</sup>Wellcome Centre for Integrative Neuroimaging, FMRIB, Nuffield Department of Clinical  
Neurosciences, University of Oxford, Oxford, United Kingdom

<sup>6</sup>MRC Brain Network Dynamics Unit, University of Oxford, Oxford, United Kingdom

**Correspondence** and material requests should be addressed to Elsa F. Fouragnan  
([elsa.fouragnan@plymouth.ac.uk](mailto:elsa.fouragnan@plymouth.ac.uk)).

## 1 **Abstract**

2 Low-intensity transcranial ultrasound stimulation (TUS) is an emerging non-invasive technique  
3 for focally modulating human brain function. The mechanisms and neurochemical substrates  
4 underlying TUS neuromodulation in humans and how these relate to excitation and inhibition  
5 are still poorly understood. In 24 healthy controls, we separately stimulated two deep cortical  
6 regions and investigated the effects of theta-burst TUS, a protocol shown to increase  
7 corticospinal excitability, on the inhibitory neurotransmitter gamma-aminobutyric acid (GABA)  
8 and functional connectivity. We show for the first time in humans that theta-burst TUS  
9 selectively reduces GABA levels in the posterior cingulate, but not the dorsal anterior cingulate  
10 cortex. Functional connectivity increased following TUS in both regions. Our findings suggest  
11 that TUS changes overall excitability by reducing GABAergic inhibition, that changes in TUS-  
12 mediated neuroplasticity last at least 50 minutes after stimulation, and that these effects may  
13 be state-dependent – a mechanism increasingly recognized to influence the brain’s response  
14 to neuromodulation.  
15

## 1 Introduction

2 Low intensity focused transcranial ultrasound stimulation (TUS) is a non-invasive  
3 neuromodulation technique that has shown promise in a range of applications from basic  
4 neuroscience research to therapeutic applications in neurological and psychiatric diseases.  
5 Compared with other non-invasive neuromodulatory techniques such as transcranial magnetic  
6 stimulation (TMS) and transcranial direct current stimulation (tDCS), TUS can target both  
7 cortical and deep brain regions with very high spatial specificity (in the order of millimetres vs  
8 centimetres in TMS and tES)<sup>1</sup>. Depending on the sonication paradigm used, the  
9 neuromodulatory effects of TUS can be limited to the period during or immediately after  
10 stimulation (“online” effects), or can last several minutes to hours after stimulation (“offline”  
11 effects)<sup>1</sup>. Offline TUS effects are of particular interest because they may reflect long-term  
12 potentiation/depression-like neuroplasticity<sup>2</sup>, lasting longer than transient neuronal adaption  
13 effects, with the potential to be used to modulate aberrant activity in brain regions or networks  
14 for therapeutic applications. It is thought that TUS induces neuromodulation primarily through  
15 mechanical interactions of the ultrasound wave as it passes through cells at the target  
16 location<sup>3,4</sup>. However, the mechanism by which this translates into excitatory or inhibitory  
17 neuromodulation and its effects on large scale human brain connectivity remain unclear.  
18  
19 The combination of offline TUS with the high spatial resolution of magnetic resonance imaging  
20 (MRI) allows the measurement of TUS effects at both the local level, in individual target  
21 regions, and at the network level across the whole brain, including in deep brain regions.  
22 Previous studies in both macaques and humans have used functional magnetic resonance  
23 imaging (fMRI) and arterial spin labelling to show large-scale changes in brain activity and  
24 perfusion due to TUS. In macaques, TUS of deep cortical and sub-cortical regions have shown  
25 changes in task-based fMRI<sup>5</sup> and behaviour<sup>6</sup> and in resting-state fMRI (rsfMRI) connectivity  
26 profiles of targeted regions<sup>7,8</sup>. In humans, TUS has been shown to effect changes in both  
27 rsfMRI connectivity and regional perfusion<sup>9,10</sup>.

1

2 With magnetic resonance spectroscopy (MRS), it is possible to quantify in vivo levels of  
3 gamma-aminobutyric acid (GABA), the major inhibitory neurotransmitter, and glutamate, the  
4 main excitatory neurotransmitter, providing insights into GABAergic and glutamatergic  
5 mechanisms of TUS-induced neuroplasticity. MRS measures of GABA are unable to  
6 distinguish between intra- or extra-cellular GABA, but are thought to represent tonic inhibition  
7 and the overall inhibitory “tone” of the region<sup>11</sup>, rather than phasic or synaptic inhibition<sup>12,13</sup>. In  
8 rats, TUS has been shown to reduce extracellular GABA with no change in glutamate levels  
9 up to 120 minutes after intervention<sup>14</sup>. To date, MRS has not been exploited to explore the  
10 neurochemical basis of TUS neuromodulation in humans.

11

12 Here, we investigate whether TUS can induce offline changes in two deep cortical regions with  
13 well-defined and separable connectivity profiles at rest: the dorsal anterior cingulate cortex  
14 (dACC), part of the salience network<sup>15</sup>, and the posterior cingulate cortex (PCC), a major hub  
15 of the default mode network, which is most active during wakeful rest<sup>16</sup>. Aberrant functional  
16 connectivity in these networks have been implicated in several neurological and psychiatric  
17 disorders<sup>17</sup>, making these regions potential targets for therapeutic TUS applications.

18

19 Using MRS and rsfMRI with a theta-burst TUS protocol shown to induce offline increases in  
20 corticospinal excitability<sup>18</sup>, we stimulated each region in separate sessions and compared the  
21 effects with a sham stimulation. We show a selective reduction in GABA levels only in the PCC  
22 at about 20-30 minutes post-stimulation. We also show increased functional connectivity  
23 following TUS of both regions, with the greatest increases in rsfMRI connectivity occurring at  
24 later (~46 minutes post-TUS) compared to earlier (~13-minutes post-TUS) time points.  
25 Additionally, stimulation of the PCC also increased functional connectivity of the dACC, but  
26 not vice versa. Importantly, we also show, via acoustic simulations, that we were able to  
27 effectively and safely target both deep cortical regions in all individuals in our study, something  
28 that is often overlooked in TUS studies of deeper brain regions. These results show, for the

1 first time in humans, in vivo GABA changes modulated by TUS, and functional connectivity  
2 changes evolving over time and lasting at least 50-minutes post-stimulation. The disparate  
3 findings between PCC and dACC stimulation suggest a possible state-dependence of TUS,  
4 with important implications for the design and development of future TUS research in humans.  
5

## 6 **Results**

7 In this preregistered study (<https://osf.io/bcf4v>) of 24 healthy adults, we investigated regionally  
8 specific TUS induced changes in GABA, glutamate, and functional connectivity, by comparing  
9 MRS and rsfMRI following TUS of ACC, TUS of PCC, or sham TUS (see study design in Fig.  
10 1). Acoustic simulations were performed on a subset of participants ( $n = 4$ ) after Session 1  
11 (the MRI only session) and before the three TUS & MRI sessions for each TUS target location  
12 to ensure we remained within TUS safety guidelines (for further details, see methods).  
13 Acoustic simulations for the remaining participants were performed at the end of the study. All  
14 participants completed three TUS and MRI sessions, in which TUS was applied either to the  
15 dACC or PCC, or sham TUS (no stimulation), followed by MRI scans. The first rsfMRI run was  
16 acquired at  $13.1 \pm 2.0$  minutes post-TUS. MRS was acquired at TUS target at  $22.3 \pm 2.0$   
17 minutes and in the control region (region not targeted with TUS during that session), at  $33.7 \pm$   
18  $2.2$  minutes post-TUS. The second rsfMRI scan was acquired at  $46.0 \pm 2.3$  minutes post-TUS.

19  
20 We first describe the results of our acoustic simulations and show the simulated transcranial  
21 pressure field for each targeted region. Next, we report TUS-mediated changes in GABA and  
22 glutamate in the dACC and PCC, followed by TUS-mediated changes in functional connectivity  
23 of the dACC and PCC. Lastly, we describe exploratory analyses of associations between  
24 spectroscopy and functional connectivity changes, and changes related to inter-individual  
25 differences in simulated transcranial acoustic measures.

26

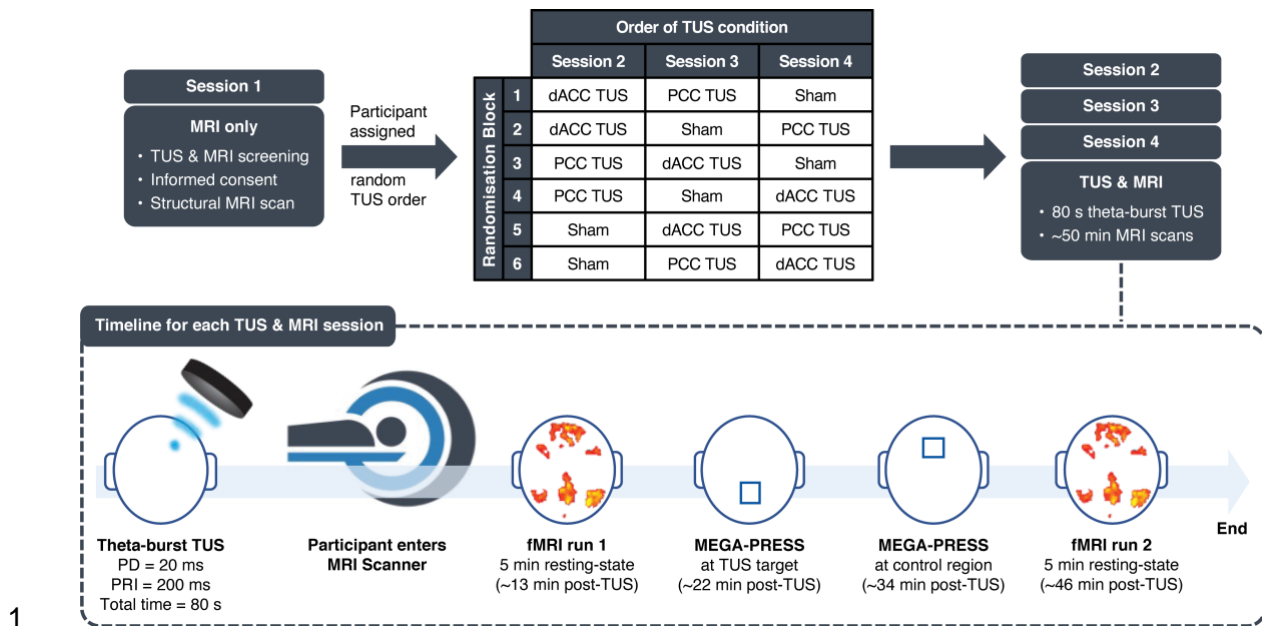

1  
2 **Figure 1. Study design.** Participants (n = 24) first attended an MRI-only session where they had a  
3 structural MRI scan and were assigned to one of six randomisation blocks, which determined the order  
4 of the TUS conditions (counterbalanced across participants). The structural MRI was used to plan and  
5 target TUS for the subsequent three study sessions involving either sham TUS or TUS applied to the  
6 dACC or PCC, immediately followed by a series of MRI scans. Scans included a 5-minute resting state  
7 fMRI run, MEGA-PRESS MRS acquired at the TUS target region, MEGA-PRESS MRS acquired at the  
8 control region (i.e., region not targeted with TUS during that session), and another 5-minute resting  
9 state fMRI run. Sessions took place at approximately the same time of day for each participant, and at  
10 least one week apart. PD: pulse duration, PRI: pulse repetition interval. Post-TUS timings shown are  
11 from the average across all participants.

12

### 13 **Characterising the ultrasound waveform with free field acoustic simulations**

14 We simulated the intensity profile of the ultrasound beam in three dimensions in free field for  
15 two focal depths: 60 mm (Fig. 2a) and 69 mm (Fig. 2b), representing the average focal depths  
16 across individuals for the dACC and PCC regions respectively. At the target spatial-peak  
17 pulse-average intensity ( $I_{SPPA}$ ) of  $54.5 \text{ W/cm}^2$ , the maximum pressure at the TUS focus was  
18  $1.28 \text{ MPa}$ , mechanical index (MI) 1.8 and spatial-peak temporal-average intensity ( $I_{SPTA}$ )  $5449$   
19  $\text{mW/cm}^2$  before transcranial transmission. Our simulations showed that the focal field along  
20 the trajectory of the beam was shorter at 60 mm than at 69 mm (the full width at half maximum,

1 FWHM, along the trajectory was 32.1 mm and 39.4 mm respectively). The FWHM of the lateral  
2 cross-sections of the beam were 4.5 mm at 60 mm and 5.0 mm at 69 mm focal depth,  
3 indicating a slightly wider TUS focus at deeper focal depths.

4

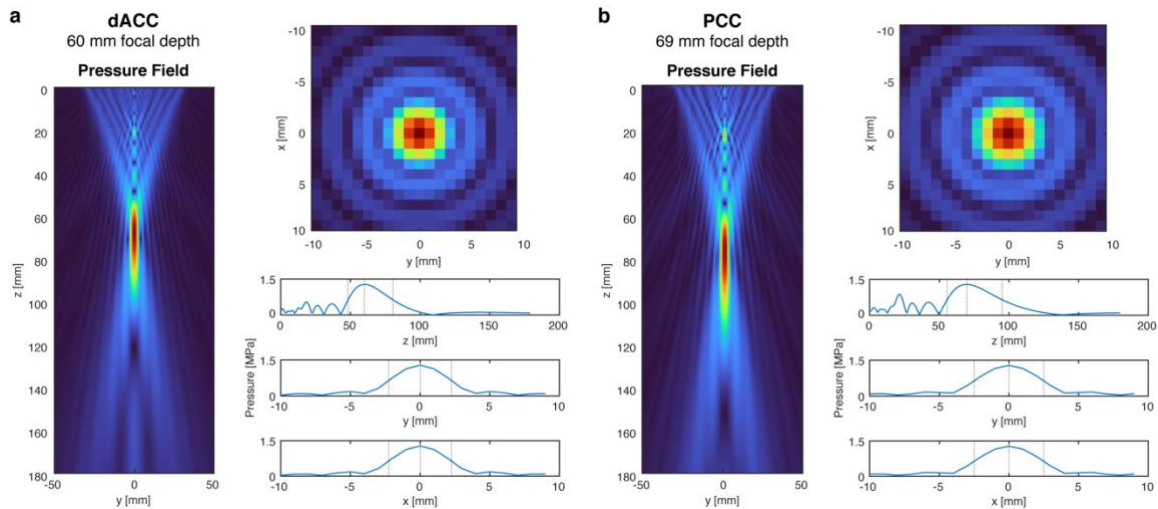

6 **Figure 2. Free field acoustic simulations at  $I_{SPPA} = 54.5 \text{ W/cm}^2$ .** The axial (z axis) and lateral (x and  
7 y axes) cross sections of the acoustic pressure as well as the pressure profile plots are shown for two  
8 focal depths: **(a)** 60 mm, based on the average depth of the dACC target, and **(b)** 69 mm, based on the  
9 PCC target. In the pressure profile plots, the dotted lines represent the lower and upper bounds of the  
10 full width at half maximum (FWHM) of the ultrasound beam. At 60 mm, this corresponded to 32.1 mm  
11 along the axial plane of the beam, and 4.5 mm laterally. At 69 mm, the FWHM was 39.4 mm and 5.0  
12 mm along the axial and lateral planes respectively.

13

## 14 Transcranial acoustic simulations

15 We estimated each participant's skull from pseudo computed tomography (CT) images  
16 derived from T1-weighted MR images (Fig. 3a). Transcranial simulations showed that the  
17 intensity profile remained elliptical, with a similar size and shape to free-field simulations, the  
18 trajectory was linear and remained approximately perpendicular to the transducer face which  
19 allowed us to reliably target the dACC and PCC (Fig. 3b) in all participants. Transcranial  
20 attenuation of focal intensity was approximately 58% on average, in line with typical values for  
21 attenuation through the skull (c.f. approximately 51.7% attenuation of intensity in acoustic tank

1 measurement through a section of a skull<sup>19</sup>). The transcranial  $I_{SPPA}$  and MI were below the  
2 United States Food & Drug Administration (US FDA) recommended limits for both regions.  
3 We simulated temperature rise in the two participants with the highest attenuation. The  
4 maximum temperature rise was found in the skull below the transducer (1.48°C and 1.88°C)  
5 and did not exceed 2°C for either individual.  
6  
7 Table 1 summarises the acoustic properties at the focus for both regions. The parameters  
8 used in the simulations and the full results of the acoustic simulations all study participants  
9 are given in Supplementary Tables 1 and 2. Both the dACC and PCC showed similar  
10 maximum intensity and pressure at the focus, however, the focal volumes (-6 dB volume, or  
11 intensity at FWHM), and hence the volumes overlapping with the MRS voxel, were smaller for  
12 dACC simulations than PCC simulations. This is likely because of the elongation of the  
13 ultrasound beam seen at deeper focal depths (Fig. 2). Our simulations showed that the  
14 elliptical TUS focus largely overlapped with the  $2 \times 2 \times 2 \text{ cm}^3$  MRS voxel during each session  
15 (Fig. 3c), suggesting consistency in the manual placement of MRS voxels across sessions,  
16 and that we were able to stimulate and measure in the same area. We also found that focal  
17 volumes were negatively correlated with  $I_{SPPA}$  (Pearson's  $r = -0.63$ ,  $p = 1.31 \times 10^{-6}$ ), such that  
18 the higher the focal volume, the lower the  $I_{SPPA}$ .



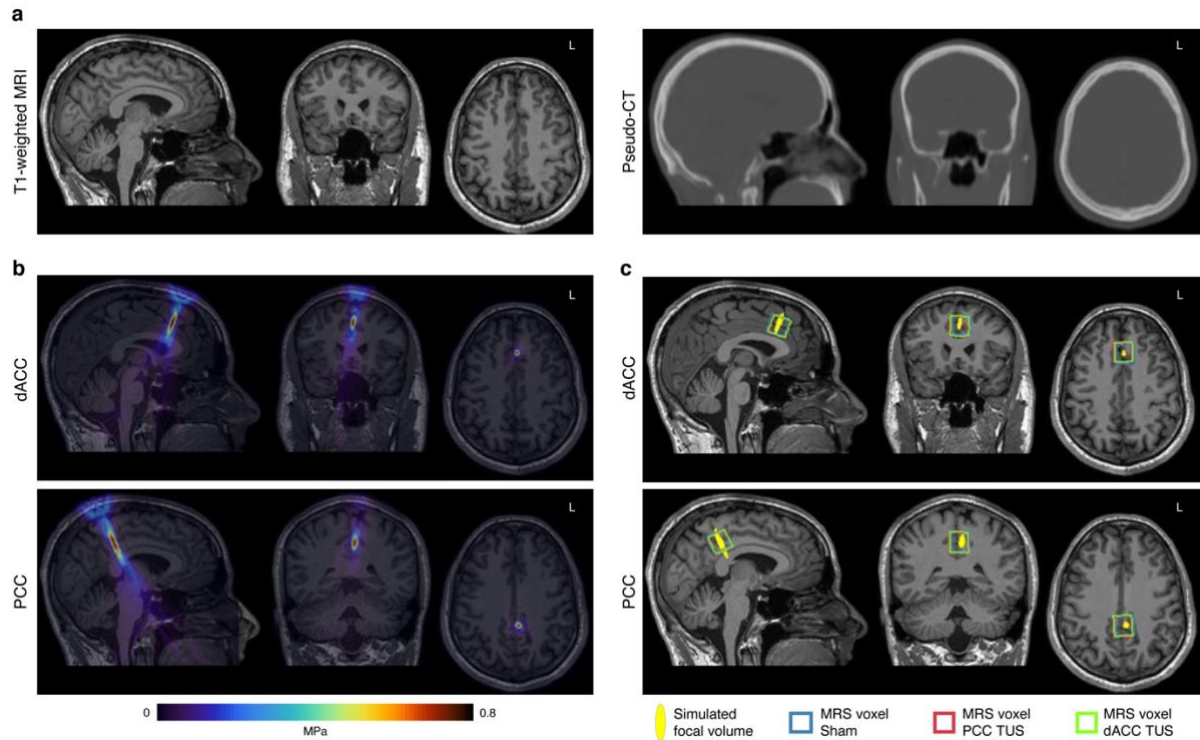

1  
2 **Figure 3. Transcranial acoustic simulations in a representative individual.** (a) Pseudo-CT (right)  
3 derived from T1-weighted MRI (left) used to estimate skull acoustic properties. (b) Simulated ultrasound  
4 pressure field overlaid on the T1-weighted MRI showing reliable targeting of the dACC and PCC. (c)  
5 Simulated TUS focal pressure volumes shown with the  $2 \times 2 \times 2 \text{ cm}^3$  MRS voxels for each session  
6 (sham in blue, PCC TUS in red, and dACC TUS in green) in a representative individual.

7

8 **Table 1. Simulated acoustic properties at the TUS focus.**

|                                                     | dACC             | PCC              | t-test p              |
|-----------------------------------------------------|------------------|------------------|-----------------------|
| Focal distance [mm]                                 | $59.5 \pm 5.5$   | $69.4 \pm 6.6$   | $7.29 \times 10^{-8}$ |
| Maximum pressure [MPa]                              | $0.82 \pm 0.06$  | $0.83 \pm 0.05$  | n.s.                  |
| MI                                                  | $1.16 \pm 0.08$  | $1.17 \pm 0.07$  | n.s.                  |
| $I_{SPPA}$ [ $\text{W}/\text{cm}^2$ ]               | $22.64 \pm 3.00$ | $22.79 \pm 2.71$ | n.s.                  |
| $I_{SPTA}$ [ $\text{mW}/\text{cm}^2$ ]              | $2264 \pm 300$   | $2279 \pm 272$   | n.s.                  |
| -6 dB focal volume [ $\text{mm}^3$ ]                | $531 \pm 189$    | $737 \pm 199$    | $8.63 \times 10^{-6}$ |
| Volume overlapping with MRS voxel [ $\text{mm}^3$ ] | $354 \pm 78.6$   | $420 \pm 82.0$   | $1.68 \times 10^{-4}$ |
| Distance to COG of MRS voxel [mm]                   | $5.5 \pm 2.9$    | $6.3 \pm 3.2$    | n.s.                  |

9 Values are given as mean  $\pm$  standard deviation. n.s. denotes non-significant t-test.  
10 MI: mechanical index;  $I_{SPPA}$ : spatial-peak pulse-average intensity;  $I_{SPTA}$ : spatial-peak temporal-average  
11 intensity; MRS: magnetic resonance spectroscopy; COG: centre-of-gravity.  
12

## 1 **Side effects associated with TUS**

2 The day after each study session, participants were sent a TUS Symptoms Questionnaire with  
3 an open-ended question: “Did you experience anything unpleasant or painful during or after  
4 the study?”. Three participants reported being more fatigued than usual after their TUS  
5 sessions. One of these three participants reported a mild headache the afternoon after their  
6 dACC TUS session, which resolved within a day, and no headache after the PCC TUS  
7 session. Another participant reported a persistent headache and neck pain after the sham  
8 session, which they attributed to having to remain still in the MRI rather than to the TUS  
9 procedure. They reported no symptoms after their TUS sessions. One participant reported a  
10 cool sensation (“as though my hair was damp”) about an inch below where the transducer was  
11 placed during the PCC TUS session. This happened in the evening after the TUS session and  
12 lasted for a few hours but was not described as unpleasant. The participant did not report any  
13 symptoms after their dACC TUS session. No other participants reported symptoms associated  
14 with TUS and were not able to distinguish between the TUS and sham sessions.

15

## 16 **TUS of the PCC selectively reduces GABA in the PCC**

17 We found that TUS applied to the PCC region reduced GABA+/water (GABA +  
18 macromolecules, relative to water) in the PCC voxel, but not in the dACC voxel, compared to  
19 sham (Fig. 4a). In the PCC voxel, the general linear model (GLM), with age, sex, simulated in  
20 situ  $I_{SPPA}$  and TUS focal volume overlapping with the MRS voxel as covariates, showed a  
21 significant main effect of session ( $F_{2,55} = 4.66$ ,  $p = 0.013$ ,  $\eta^2 = 0.141$ ). Post-hoc comparisons  
22 were statistically significant for PCC TUS vs sham ( $t_{55} = -2.88$ ,  $p = 0.017$ , Cohen’s  $d = -0.92$ )  
23 and PCC TUS vs dACC TUS ( $t_{55} = -2.32$ ,  $p = 0.048$ , Cohen’s  $d = -0.73$ ), with no significant  
24 difference between dACC TUS and sham ( $t_{55} = -0.57$ ,  $p = 0.570$ , Cohen’s  $d = -0.18$ ). There  
25 were no significant differences between sessions in GABA+/water measured in the dACC  
26 voxel after dACC TUS (Fig. 4b), and no significant differences in Glx/water (the glutamate +  
27 glutamine complex, relative to water) between sessions in either voxel. These results show a

1 localised decrease in GABA in the PCC after PCC TUS, suggesting a selective reduction in  
2 GABA only in the region that was sonicated.

3

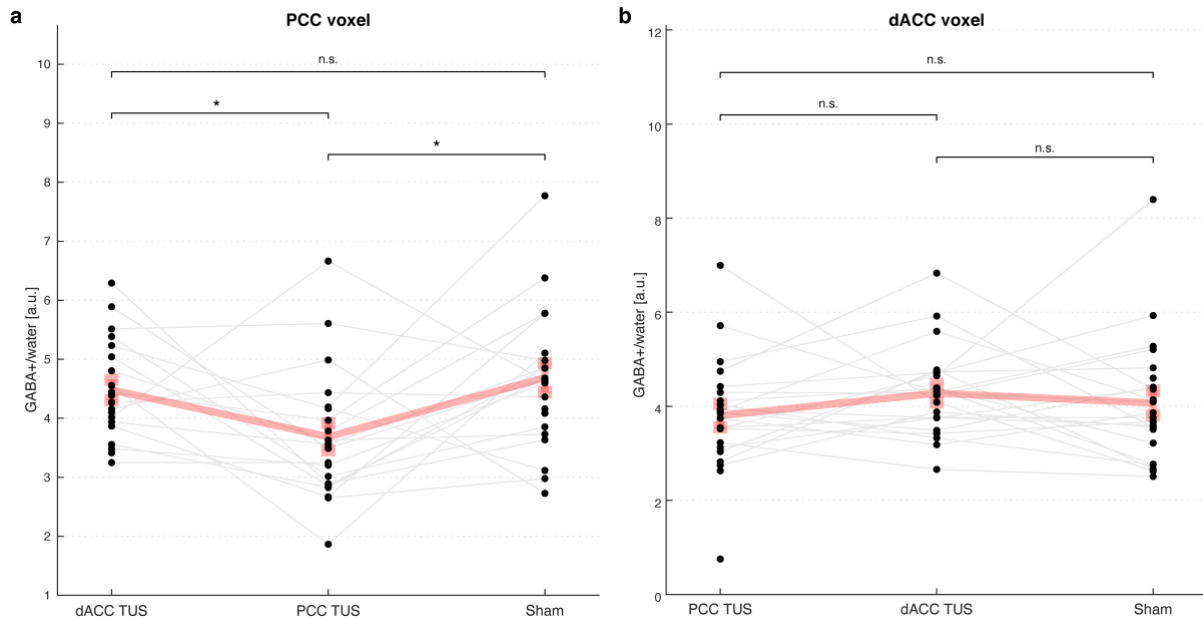

4

5 **Figure 4. Changes in GABA+/water after TUS.** Concentrations of GABA+/water are shown in the (a)  
6 PCC voxel and (b) dACC voxel after each TUS session and sham. The active TUS session (i.e., when  
7 TUS was applied to and measured in the same region) is shown in the middle in both plots, to aid in the  
8 visual comparison against the sham and the control TUS sessions. The grey lines link measurements  
9 from the same individual across TUS sessions. The bold pink line represents the mean and standard  
10 error of the mean for each session. \*:  $p < 0.05$ , n.s.: not significant.

11

## 12 TUS increases functional connectivity with the targeted region

13 We first investigated changes in functional connectivity with the TUS target with a seed-based  
14 connectivity approach using a dilated mask of the TUS focal volume as the seed. Group-  
15 average maps of regions showing connectivity with the dACC and PCC seed during each run  
16 of the sham session are shown in Supplementary Figure 1. These illustrate the relationship  
17 between the two regions and the classical salience network and default mode network for the  
18 dACC and the PCC respectively. We found no significant differences between the first and  
19 second rsfMRI runs during the sham session for either seed. Accordingly, whole-brain maps

1 of connectivity with the TUS target were compared between each run of the TUS sessions  
2 and the average of the two runs during the sham session.

3

4 We found increases in functional connectivity with the dACC after both TUS of the dACC and  
5 TUS of the PCC compared with sham (all comparisons cluster corrected at  $p < 0.05$ ).  
6 Functional connectivity of the dACC increased in the precuneus cortex approximately 13  
7 minutes after TUS of dACC compared with sham. Approximately 46 minutes after TUS of the  
8 dACC, functional connectivity of the dACC was increased in a wider range of regions including  
9 the precuneus and intracalcarine cortex, bilateral thalamus, right putamen, left  
10 parahippocampal gyrus, supplementary motor cortex including bilateral pre- and post- central  
11 gyri compared with sham (Figure 5a).

12

13 Increases in functional connectivity of the dACC were also observed in the bilateral pre-central  
14 gyri and the right superior parietal lobe 13 minutes after TUS of the PCC compared with sham  
15 (Supplementary Figure 2), which might indicate that PCC neuromodulation can affect brain  
16 connectivity beyond the region targeted. No significant differences were seen 46 minutes after  
17 TUS of the PCC compared with sham.

18

19 Functional connectivity of the PCC increased only after TUS of the PCC compared with sham.  
20 In other words, the network profile of the PCC was not affected by TUS applied to another  
21 region, here the dACC. Functional connectivity was increased with the bilateral putamen at 13  
22 minutes, and with the precentral gyrus, bilateral auditory cortex and left temporal pole at 46  
23 minutes after TUS of the PCC compared with sham (Fig. 5b).

24

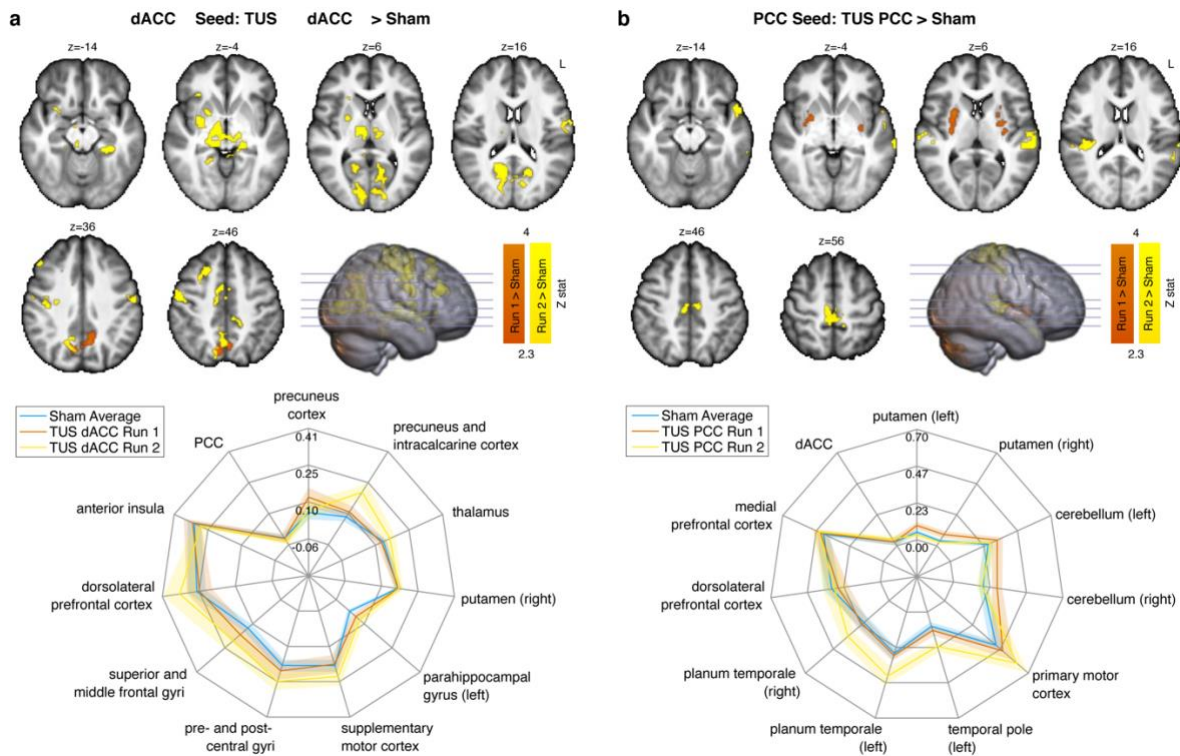

1

2

**Figure 5. Functional connectivity changes after TUS: seed-based connectivity analysis.** Whole-

3

brain maps illustrate regions showing increased functional connectivity with **(a)** the dACC seed after

4

TUS was applied to the dACC, and **(b)** with the PCC seed after TUS was applied to the PCC, compared

5

with sham (Z statistics; cluster-corrected at  $p < 0.05$ ). Clusters in orange represent regions with

6

significantly higher functional connectivity at approximately 13 minutes after TUS (i.e., fMRI Run 1), and

7

clusters in yellow show regions with significantly higher functional connectivity at approximately 46

8

minutes after TUS (fMRI Run 2) compared with the average of both sham runs. For each seed region,

9

the spider plots show the functional connectivity (parameter estimate) during each run sampled from

10

the regions showing significantly increased connectivity and three control regions: the region not

11

targeted with TUS (i.e., for the dACC seed, this would be the PCC, and vice versa), a region known to

12

be highly connected to the seed region (the anterior insula for the dACC seed, and the medial prefrontal

13

cortex for the PCC seed), and the dorsolateral prefrontal cortex. The error bars show standard error of

14

the mean. Whole-brain maps are overlaid on the average T1-weighted MRI of all participants.

15

1 **TUS increases functional connectivity of the resting-state functional**  
2 **connectivity network**

3 To investigate the effect of TUS on whole-brain networks at rest, we identified two well-defined  
4 resting-state functional connectivity networks associated with our TUS targets using  
5 independent components analysis (ICA): the salience network, which has the dACC as a  
6 major component, and default mode network, of which the PCC is a major hub (Figure 6).  
7 Subject-specific maps of each network were obtained via dual regression and each run of  
8 each TUS session was compared against the average of the sham runs.

9  
10 We found increased connectivity of the salience network after TUS of the dACC, and  
11 increased connectivity of the default mode network after TUS of the PCC compared with sham  
12 (Figure 6). Notably, these changes were only seen during the later run of rsfMRI (i.e.,  
13 approximately 46 minutes after TUS), consistent with the larger functional connectivity  
14 changes after TUS observed with the seed-based connectivity analysis. There were no  
15 significant changes in connectivity of the salience or default mode networks when TUS was  
16 applied to the other region.

17  
18 **No associations between GABA and functional connectivity changes**

19 We found no significant correlations between changes in GABA and functional connectivity  
20 changes and no correlations between these changes and the focal volumes or intensity from  
21 acoustic simulations.

22

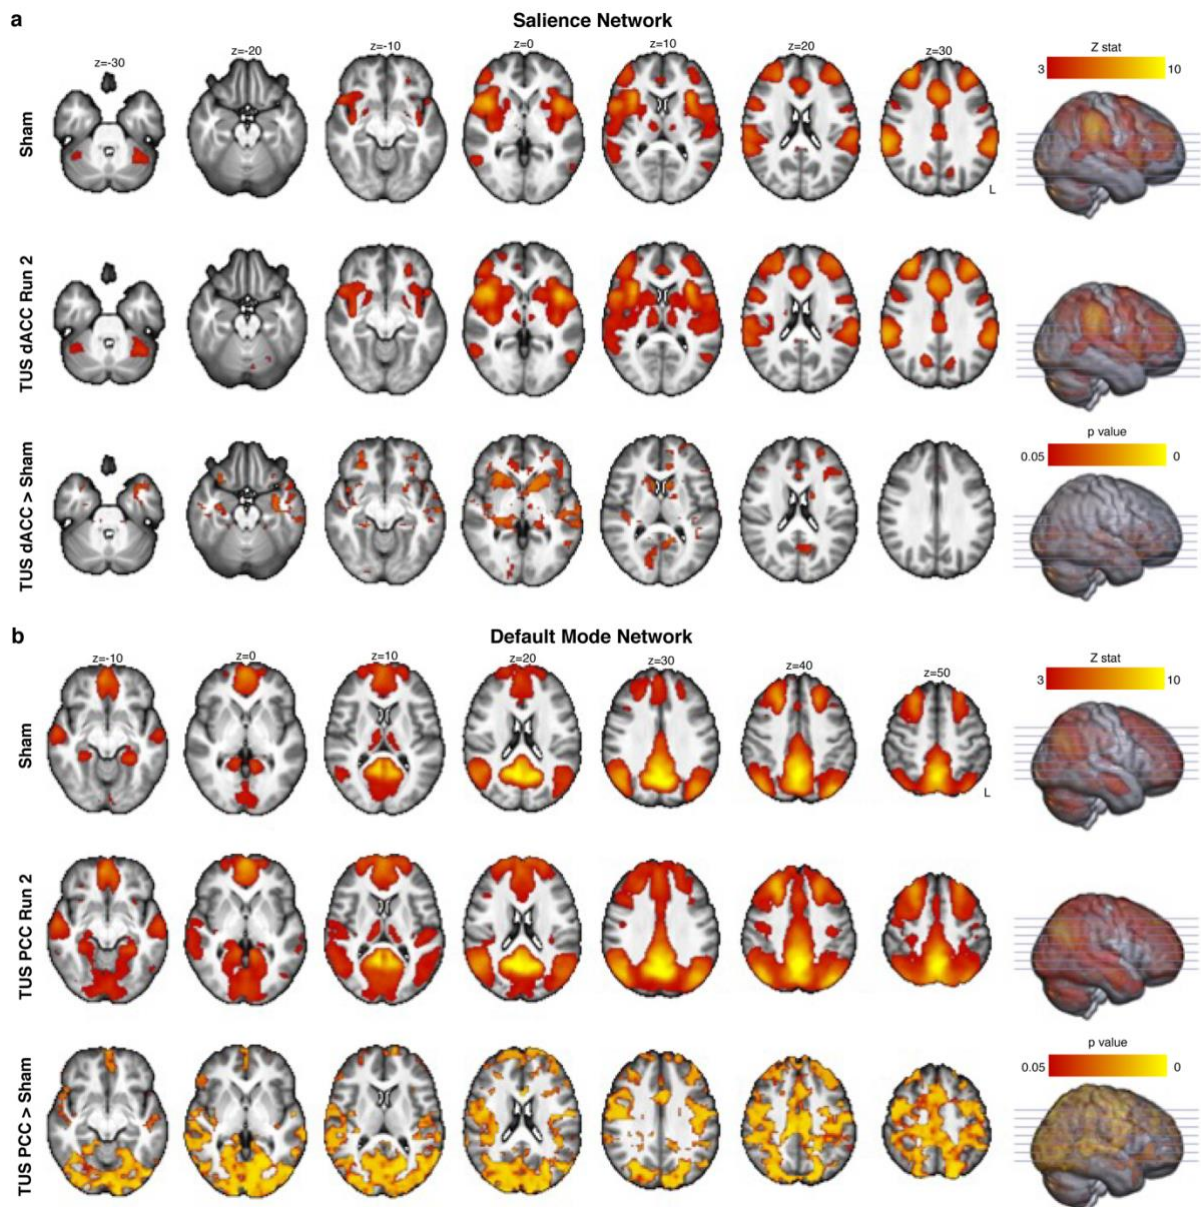

1

2 **Figure 6. Functional connectivity changes after TUS: independent components analysis. (a)**

3 Group average maps of the **(a)** salience network and **(b)** default mode network identified using

4 independent components analysis on fMRI runs during sham sessions are shown in the top row of each

5 sub-panel. The middle row shows the group average network during the fMRI run approximately 46

6 minutes after TUS (i.e., fMRI run 2) obtained via dual regression. The bottom row shows the spatial

7 map of significant differences in connectivity of the networks between run 2 of the TUS sessions and

8 the average of sham sessions.

9

## 1 Discussion

2 Here we show neurochemical and functional connectivity changes after 80-seconds of offline  
3 theta-burst-patterned TUS in two deep cortical regions. We found consistent and robust  
4 changes in the PCC across MR modalities: decreased GABA as measured with MRS and  
5 increased rsfMRI functional connectivity with both the PCC target as well as with the default  
6 mode network. Our findings were less clear in the dACC, where we found only an increase in  
7 functional connectivity with the target and with the salience network, but no changes in GABA.  
8 Taken together, these changes suggest that theta-burst TUS can transiently decrease cortical  
9 inhibition in deep cortical regions in humans for at least 50 minutes after TUS. Our findings  
10 complement existing evidence that theta-burst TUS increases corticospinal excitability in the  
11 human motor cortex<sup>18</sup>, and additionally present new evidence of neurochemical and functional  
12 connectivity changes associated with theta-burst TUS in deep cortical regions. The timescale  
13 of excitability changes, up to at least 50 minutes after TUS, relative to the duration of  
14 stimulation applied suggests induction of reversible neuroplasticity, possibly linked to long-  
15 term potentiation/depression of neurons.

16  
17 The significant decrease in GABA levels in the PCC voxel after theta-burst TUS was applied  
18 to the PCC compared to both sham and TUS applied to the dACC, suggests a localised  
19 decrease in GABA within the targeted region. This is the first time that a TUS-mediated  
20 reduction in GABA has been shown in humans, and complements findings of extracellular  
21 GABA decreases in rats following ultrasound<sup>14</sup>. Localised decreases in GABA have been  
22 reported after other types of stimulation, including TMS and tDCS. In humans, studies using  
23 repetitive TMS with MRS (for a review, see<sup>12</sup>) have shown changes in GABA levels at the TMS  
24 target<sup>20,21</sup> and also in a network regions connected to the target<sup>22,23</sup>. In a study using anodal  
25 tDCS, GABA was found to gradually decrease during the 20-minute stimulation duration, with  
26 the largest decrease found at around 10-15 minutes post-stimulation before gradually  
27 returning to baseline<sup>24</sup>. Here, we show that the 80-second theta-burst TUS protocol induces



1 GABA decreases that persist up to at least 30 minutes post-stimulation, however, because we  
2 only sampled one voxel at the TUS target location during each session, it is unknown how  
3 GABA levels change during and immediately after stimulation, and how long it would take for  
4 GABA levels to return to baseline after TUS.

5  
6 Functional connectivity of the PCC was increased in a network of whole brain regions after  
7 TUS of the PCC, complementing the decreased GABA (or decreased inhibition) found with  
8 MRS. Functional connectivity of the dACC was also increased after TUS of the dACC,  
9 although no corresponding changes in GABA were found. In both the seed-based and  
10 network-based analyses, there were differences in the pattern of increased connectivity  
11 between the early and late rsfMRI runs (approximately 13- and 46-minutes post-TUS  
12 respectively), with a larger network of regions showing increased connectivity in the late  
13 rsfMRI run. This was reflected in the network-based ICA where both the default mode network  
14 and salience network showed significant changes from sham after TUS of their associated  
15 region, only in the late rsfMRI run and not the early run.

16  
17 Several studies have reported fMRI changes with “online” TUS predominantly in the regions  
18 targeted with TUS<sup>25,26</sup>, however relatively few studies have reported fMRI or blood flow  
19 changes with offline TUS protocols thought to induce longer-term changes in cortical  
20 excitability. In one such study, TUS applied to the right inferior frontal gyrus decreased  
21 functional connectivity in a network of regions related to emotion and mood regulation<sup>9</sup>.  
22 Another targeting the globus pallidus with an inhibitory TUS protocol found decreased  
23 connectivity in a network of frontoparietal and thalamic regions<sup>10</sup>. Our results complement  
24 these studies and show distal changes in a network of brain regions functionally related to the  
25 TUS target. We did not find an association between functional connectivity and GABA  
26 changes, which could be due to different mechanisms underlying GABA-mediated localised  
27 decreases in cortical inhibition and increases in functional connectivity in the network of  
28 regions distal but functionally connected to the targeted region.

1

2 Our results also suggest a possible state-dependent mechanism underlying TUS  
3 neuromodulation. We saw a pattern of more robust effects of neuromodulation when TUS was  
4 applied to the PCC: local changes in GABA were also only found with TUS applied to the PCC  
5 but not with TUS of the dACC, and although TUS of both regions showed functional  
6 connectivity changes in their respective networks, TUS of the PCC additionally increased  
7 functional connectivity of the dACC seed. The PCC is a major component of the default mode  
8 network, which is known to be more “active” during rest, while the dACC is part of the salience  
9 network, which is typically found to be anti-correlated with the default mode network. There is  
10 growing evidence for a state-dependent mechanism in brain stimulation<sup>27</sup>, and it is increasingly  
11 accepted that the cognitive state or state of consciousness has an important influence over  
12 how the brain will respond to interventions. In patch-clamp recordings in CA1 pyramidal  
13 neurons of rodent hippocampal brain slices, ultrasound has been shown to either inhibit or  
14 potentiate neuronal firing depending on the regime of the cells targeted<sup>28</sup>. Similarly, in  
15 macaques, the modulatory effects of TUS differ depending on whether the neurons are active  
16 or at rest<sup>29</sup>.

17

18 The inherent differences in cortical morphology and composition of neurons in the PCC and  
19 dACC could also contribute to the difference of neuromodulatory effects found. The dACC is  
20 a complex region and 70% of individuals show an additional cingulate sulcus, the  
21 paracingulate sulcus, in addition to the cingulate sulcus in at least one hemisphere<sup>30</sup>. This  
22 could contribute to more heterogeneous function of the dACC and similarly a heterogeneous  
23 response to neurostimulation. There is also the possibility that stimulation exhibits distinct  
24 neuromodulatory effects in different neuron populations. Transcriptomics data from the  
25 Human Protein Atlas<sup>31</sup> suggest potential tissue-composition differences between the two  
26 regions, specifically variation in the presence of several ion channels. T-type Ca<sup>2+</sup> channels  
27 for example are thought to be sensitive to sonication<sup>3</sup> and corresponding protein-coding genes  
28 may be expressed preferentially in the PCC compared to the dACC<sup>31</sup>.

1

2 We found no changes in the concentration of Glx (the glutamine + glutamate complex). There  
3 could be several explanations for this. Firstly, MEGA-PRESS is a GABA editing sequence and  
4 not optimised for measuring Glx. Glx may be quantified from off-resonance MEGA-PRESS  
5 spectra, but it is unclear how reliable these measurements are in different brain regions. One  
6 study has found that PRESS and off-resonance MEGA-PRESS Glx estimates are highly  
7 correlated in the dorsolateral frontal cortex<sup>32</sup>. However, another study specifically looking at  
8 the dACC found that there was better agreement between PRESS and off-resonance MEGA-  
9 PRESS in the sensorimotor cortex than in dACC, although both regions showed poor  
10 agreement with separately acquired PRESS spectra. Future studies could use other  
11 sequences to quantify Glx or acquire spectra at higher MR field strength so that glutamine and  
12 glutamate signals can be measured separately.

13

14 Our acoustic simulations show differences in the pressure profile and size of the focal field at  
15 different target depths, which is an important consideration when targeting deep cortical  
16 regions and highlights the importance of acoustic simulations in TUS. We saw inter-individual  
17 variability in terms of focal volume (approximately 200 mm<sup>3</sup>, or 27-37% of the average focal  
18 volume for PCC and dACC respectively) and intensity (approximately 3 W/cm<sup>2</sup>, or 12-13% of  
19 the average intensity) at the TUS targets. This inter-individual variability could be due to  
20 several factors including scattering of the acoustic pressure due to the skull and positioning of  
21 the TUS relative to the individual's skull. Although we did not find any associations between  
22 the variability of focal volume or intensity with the amount of change in GABA or functional  
23 connectivity, this may be different in more difficult to target regions (e.g., where the skull is not  
24 strictly perpendicular to the trajectory of the beam, or is heterogeneous in its composition),  
25 and is worth considering or accounting for when analysing the results.

26

27 At present, there is interest in the TUS research community to identify TUS protocols that are  
28 either excitatory or inhibitory. Our findings help shed light on this process by providing an

1 explanation for how theta-burst TUS induces neuroplasticity in two deep cortical targets as  
2 well as their associated networks of whole-brain regions and suggest that these changes may  
3 be state-dependent. This has fundamental implications for the understanding and design of  
4 both basic TUS research and its clinical translation.

5

## 6 **Methods**

### 7 **Participants**

8 Twenty-four healthy volunteers (14 female) aged between 22 and 53 years (mean = 33.8, s.d.  
9  $\pm$  9.7) participated in the study. Participants reported no current diagnosis of neurological or  
10 psychiatric disorders and were not taking any medications known to affect brain excitability at  
11 the time of the study. Specifically for TUS and MRI safety, we excluded participants who at  
12 the time of the study: 1) were pregnant (self-reported), 2) were using psychoactive drugs, 3)  
13 had any contraindication to MRI, 4) had a current or previous diagnosis of any neurological  
14 disorders, 5) had a current or previous diagnosis of psychiatric disorders (including enduring  
15 severe mental illness but excluding history of depression/anxiety), 6) had a first-degree relative  
16 with epilepsy, 7) experience extreme mood fluctuations, or 8) were currently using prescription  
17 or non-prescription medication, unless these did not interfere with study procedures or  
18 compromise safety. The study was approved by the University of Plymouth Faculty of Health  
19 Staff Research Ethics and Integrity Committee (reference ID: 2487; date: 13/12/2021). Written  
20 informed consent was obtained from all participants after experimental procedures were  
21 explained in full. All study sessions took place at the Brain Research and Imaging Centre in  
22 Plymouth, United Kingdom.

23

### 24 **Study design**

25 All participants completed three separate study sessions at least one week apart and at the  
26 same time of the day for each participant ( $\pm$  30 minutes) to control for the effects of the  
27 circadian rhythm on GABA fluctuations. During each session, they underwent TUS applied to

1 either the dACC, the PCC, or sham TUS, followed by a series of MRI scans. During the sham  
2 TUS session, no stimulation was delivered, and the transducer was positioned over the mid-  
3 cingulate cortex. The order of the three sessions (dACC TUS, PCC TUS, or sham TUS) was  
4 counterbalanced across subjects.

5

6 For participants who were assigned to have verum TUS as their first session, we acquired a  
7 high-resolution T1-weighted MR image prior to their first session. The high-resolution T1-  
8 weighted MR image was used to estimate each participant's skull model of bone density and  
9 geometry for use in acoustic simulations and for neuronavigation.

10

## 11 **Ultrasound stimulation**

12 We used the NeuroFUS TPO and CTX-500-4 transducer (Brainbox Ltd., Cardiff, UK). This  
13 consisted of a four-element ultrasound transducer (64 mm diameter) with a central frequency  
14 of 500 kHz. We used the theta-burst TUS protocol<sup>18</sup> with the following parameters: pulse  
15 duration = 20 ms, pulse repetition interval = 200 ms, and total duration = 80 s, giving a total of  
16 400 pulses. The target free field spatial-peak pulse-average intensity ( $I_{SPPA}$ ) was kept constant  
17 at 54.5 W/cm<sup>2</sup> for each participant. We performed transcranial acoustic simulations (see  
18 "Acoustic simulations" section) to ensure that we remained below the FDA guidelines for  
19 diagnostic ultrasound ( $MI \leq 1.9$ ;  $I_{SPPA} \leq 190$  W/cm<sup>2</sup>) after transcranial transmission. In addition,  
20 we ensured that the maximum temperature rise across the entire 80 s duration of TUS did not  
21 exceed 2°C in all our thermal simulations.

22

23 We prepared each participant's head by parting any hair over the intended target and applying  
24 ultrasound transmission gel (Aquasonic 100, Parker Laboratories Inc.). We applied ultrasound  
25 gel to the transducer, used a gel pad (Aquaflex, Parker Laboratories Inc.) and, as far as  
26 practically possible, ensured no air bubbles between the transducer face and participant's  
27 head.

1

2 Neuronavigation was performed with the Brainsight software (Rogue Research Inc., Montréal,  
3 Québec, Canada) on anatomical T1-weighted MRI scans from each participant. The focal  
4 depth was adjusted for each participant and brain region based on the neuronavigated target.  
5 During TUS, we sampled the transducer coordinates with the software and noted any  
6 deviations from the intended focus. The positions of the transducer and target were used in  
7 acoustic simulations. After each TUS sonication, participants were asked to report any  
8 symptoms they think were associated with TUS via an open-ended TUS symptoms  
9 questionnaire completed the following day.

10

11 Sham TUS was delivered in the same way as verum TUS, except that the power to the  
12 transducer was turned off. To control for auditory effects, we played a sound mimicking the  
13 pulse repetition and duration of verum TUS via bone conduction headphones. Headphones  
14 were placed on the participant's head approximately 2 cm posterior to the temples for all the  
15 sessions, but the sound was only played during the sham session. When they had completed  
16 all three sessions, participants were asked if they could distinguish between sham and verum  
17 TUS.

18

## 19 **Magnetic resonance acquisition**

20 Immediately following TUS, participants underwent a series of MRI scans on a Siemens  
21 MAGNETOM Prisma 3T scanner (VE11E, Siemens Healthineers, Erlangen, Germany) with a  
22 32-channel head coil. The sequence of scans was as follows:

- 23 1. T1-weighted magnetisation-prepared rapid gradient echo (MPRAGE) sequence  
24 acquired in the sagittal plane for MRS voxel planning (2100 ms repetition time (TR),  
25 2.26 ms echo time (TE), 900 ms inversion time (TI), 8° flip angle (FA), GRAPPA  
26 acceleration factor of 2, and 1 mm<sup>3</sup> voxel size)
- 27 2. Localiser (to check for movement relative to T1-weighted MR scan)

- 1        3. 5-minute resting-state gradient echo echo planar imaging (GE-EPI) fMRI scan during
- 2            which the MRS voxels were positioned (acquisition plane approximately parallel to the
- 3            AC-PC line, 2000 ms TR, 30 ms TE, 74° FA, 2.5 mm slice thickness and slice spacing,
- 4            multi-band acceleration factor of 2, and 60 interleaved slices of 80 × 80 matrix size,
- 5            giving a voxel size of 2.5 × 2.5 × 2.5 mm<sup>3</sup>)
- 6        4. pre-MRS localiser
- 7        5. MRS flip angle calibration (with voxel placed on TUS target region)
- 8        6. MRS acquisition in TUS target region (2 × 2 × 2 cm<sup>3</sup> voxel, single-voxel spectroscopy
- 9            MEGA-PRESS sequence<sup>33</sup>, 2000 ms TR, 68 ms TE, with VAPOR water suppression,
- 10           128 averages, water unsuppressed reference: 16 averages)
- 11        7. MRS acquisition in control region (with same parameters as above)
- 12        8. post-MRS localiser
- 13        9. field map
- 14        10. 5-minute resting state fMRI (with same parameters as above)

15    Automatic shimming was performed before each MRS acquisition, with additional manual  
16    shimming applied if the full-width half-maximum of the signal was over 20 Hz.

17

## 18    **Target location for ultrasound and MRS**

19    The dACC and PCC targets for TUS were identified based on an initial co-registration with the  
20    Montreal Neurological Institute (MNI) coordinate space at x = -5, y = 24, z = 30 for the dACC  
21    and x = -5, y = -35, z = 35 for the PCC. This was then adjusted based anatomical landmarks  
22    on each individual's T1-weighted MRI. The dACC target was aligned with the back of the genu  
23    and superior-most point of the body of the corpus callosum, centred on a patch of grey matter  
24    in the cingulate gyrus. The PCC target was aligned with the middle of the splenium of the  
25    corpus callosum, roughly in line with the ascending ramus of the cingulate sulcus and centred  
26    on a patch of grey matter just anterior to this, below the cingulate sulcus. MRS was acquired  
27    in a voxel centred on the target from the TUS session to ensure overlap between the TUS

1 focus and MRS acquisition. An example of voxel placement in a representative individual is  
2 shown in Fig. 2c.

3

#### 4 **Acoustic simulations**

5 We used the k-Wave Toolbox<sup>34</sup> (version 1.3) in MATLAB (R2020b, MathWorks, Inc.) and  
6 kArray tools<sup>35</sup> to model our transducer. We first performed acoustic simulations in water to  
7 characterise the ultrasound beam before transcranial attenuation for a target  $I_{SPPA}$  of 54.5  
8 W/cm<sup>2</sup>. Since the dACC and PCC are at different depths in the cortex, we performed simulated  
9 the ultrasound beam for a focal depth of 60 mm and 69 mm, representing the average focal  
10 depths of the dACC and PCC targets across all individuals.

11

12 Next, we performed transcranial simulations for the dACC and PCC for each participant in the  
13 study. We estimated the skull for each participant from a pseudo-CT derived from the  
14 participant's T1-weighted MRI using a deep learning method<sup>36,37</sup>. The skull was obtained from  
15 pseudo-CT images by thresholding at 300 HU and clamping values above 2000 HU. Pseudo-  
16 CT HU intensities were linearly mapped to acoustic properties using equations for density,  
17 speed of sound and absorption coefficient as described in<sup>38,39</sup>. We set our simulation grid size  
18 to the size of the T1-weighted MRI with a grid spacing of 1 mm. Our acoustic simulation  
19 methods are described in further detail elsewhere<sup>40</sup> and the code is available online<sup>41</sup>.

20

#### 21 **Spectroscopy data analysis**

22 MRS processing and analysis was performed in Gannet<sup>42</sup> (<http://www.gabamrs.com/>).  
23 Processing steps included 3 Hz line broadening, correction for frequency and phase errors by  
24 spectral registration<sup>43</sup>, outlier rejection, time averaging, and eddy current correction. The  
25 edited difference spectrum was modelled to quantify the 3.0 ppm GABA+ and 3.75 ppm Glx  
26 signals relative to water. The T1-weighted MR image was segmented using SPM12<sup>44</sup> to obtain  
27 tissue-corrected measurements<sup>45</sup> within the MRS voxel. MRS spectra were visually inspected



1 for spectral artifacts, including lipid contamination, subtraction errors and a non-constant  
2 baseline. We excluded data if they were outliers on the following quality metrics: FWHM,  
3 GABA+ signal-to-noise ratio (SNR), linewidth, and model fit errors. Example spectra acquired  
4 from the dACC and PCC voxel during a Sham session are shown in Supplementary Figure 3.

5

6 For each voxel, changes in GABA+/water and Glx/water between both TUS and sham  
7 sessions were assessed with a GLM with age, sex, simulated in situ  $I_{SPPA}$ , and simulated TUS  
8 focal volume within the MRS voxel as covariates (with main effects and post-hoc tests, using  
9 the Holm correction for multiple comparisons, considered statistically significant at  $p < 0.05$ ).

10 Covariates were chosen based on factors that are likely to affect GABA levels within the voxel.

11

## 12 **Functional MR data analysis: seed-based connectivity**

13 fMRI data were pre-processed and analysed using FEAT (fMRI Expert Analysis Tool)  
14 Version 6.00, part of FSL (FMRIB's Software Library, [www.fmrib.ox.ac.uk/fsl](http://www.fmrib.ox.ac.uk/fsl)). Pre-processing  
15 included motion correction, B0 field inhomogeneity correction, brain extraction, spatial  
16 smoothing (5 mm FWHM) and highpass filtering (0.01 Hz). rsfMRI data were co-registered to  
17 the MNI standard space via a linear transform to the subject's high-resolution T1-weighted  
18 MRI and a non-linear transform to the MNI template. Motion outliers were identified using the  
19 *fslmotionoutliers* tool and were included as nuisance covariates along with the average signal  
20 from the white matter and cerebrospinal fluid, and the six motion parameters from the motion  
21 correction step.

22

23 For each subject and each session, a seed-based connectivity analysis was performed with  
24 the subject-specific TUS focal volumes obtained from the dACC and PCC acoustic simulations  
25 as seeds. To create the subject-specific TUS seed, a binary mask was first created from the  
26 top 25% maximum pressure intensities in the simulated pressure field. This binary volume was  
27 then dilated by two voxels to give an average seed volume of  $805 \pm 162 \text{ mm}^3$  for the dACC

1 and  $1003 \pm 178 \text{ mm}^3$  for the PCC (for reference, a typical 6 mm radius spherical seed used in  
2 seed-based functional connectivity analyses had a volume of  $905 \text{ mm}^3$ ). The average  
3 timeseries was sampled from each seed and used as the variable of interest in a voxel-wise  
4 whole-brain GLM implemented using FSL's FEAT, with the nuisance regressors described  
5 above as variables of non-interest.

6  
7 Functional connectivity of the dACC and PCC seed were first combined at the subject level,  
8 comparing each TUS session and run against the mean of the sham runs with a fixed effects  
9 model. Comparisons across subjects for each seed were done using a mixed-effects model  
10 (FLAME1+2) with automatic outlier detection with age and sex as covariates. Whole-brain Z  
11 statistic maps were thresholded using clusters determined by  $Z > 2.3$  ( $p = 0.05$ ) and a  
12 familywise error-corrected cluster significance threshold of  $p = 0.05$ .

13

#### 14 **Functional MR data analysis: resting-state network connectivity**

15 We investigated the effect of TUS on two brain networks of interest at rest involving our two  
16 target brain regions. These were 1) the salience network, comprising the dACC and anterior  
17 insula, and 2) the default mode network, comprising the PCC, medial prefrontal cortex and  
18 bilateral angular gyri.

19

20 We first identified the group-average spatial maps of the networks of interest using  
21 independent components analysis (multi-session temporal concatenation in FSL MELODIC;  
22 <https://fsl.fmrib.ox.ac.uk/fsl/fslwiki/MELODIC>) of the sham sessions only. We then used a dual  
23 regression approach to generate subject-specific versions of the group-average spatial maps  
24 and associated timeseries<sup>46</sup> for each subject, session and run. Briefly, this involved regressing  
25 the group-average set of spatial maps (as spatial regressors in a multiple regression) onto  
26 each subject's 4D space-time dataset, giving a set of subject-specific timeseries, one per  
27 group-level spatial map. Next, those timeseries are regressed (as temporal regressors in a

1 multiple regression) into the same 4D dataset, resulting in a set of subject-specific spatial  
2 maps, one per group-level spatial map. We then tested for session differences using FSL's  
3 randomise permutation-testing tool and 5000 permutations.

4

## 5 **Exploratory analyses: relationship between GABA and functional connectivity** 6 **changes and associations with simulated in situ TUS intensity**

7 We investigated whether the TUS-mediated changes in GABA and functional connectivity of  
8 the PCC were correlated using Pearson's correlations. First, we sampled the mean functional  
9 connectivity strength within regions showing a significant difference in connectivity for each  
10 individual rsfMRI run. The difference in functional connectivity between PCC and sham runs  
11 was then correlated against the difference in GABA between PCC and sham sessions.  
12 Correlations were assessed for significance at the conventional alpha value of  $p < 0.05$ .

13

14 The skull accounts for a large amount of attenuation and aberration of the TUS intensity at the  
15 target location and the amount of attenuation varies between individuals based on skull  
16 structure and depth of target. We explored the association between simulated TUS intensity  
17 and focal volume and MRS and rsfMRI measures across individuals using Pearson's  
18 correlations as above.

19

## 20 **Data Availability**

21 Data supporting the findings of this study are available at <https://osf.io/rp5g4/>. The code for  
22 generating pseudo-CT from T1-weighted MR images and for running the acoustic simulations  
23 as described in this work are available on GitHub: <https://github.com/sitiny/mr-to-pct> and  
24 [https://github.com/sitiny/BRIC\\_TUS\\_Simulation\\_Tools](https://github.com/sitiny/BRIC_TUS_Simulation_Tools). Further information or raw or  
25 processed data can be made available by the corresponding author on reasonable request.

## 1 **References**

- 2 1. Darmani, G. *et al.* Non-invasive transcranial ultrasound stimulation for  
3 neuromodulation. *Clin. Neurophysiol.* **135**, 51–73 (2022).
- 4 2. Yoo, S.-S. *et al.* Focused ultrasound brain stimulation to anesthetized rats induces long-  
5 term changes in somatosensory evoked potentials. *Int. J. Imaging Syst. Technol.* **28**,  
6 106–112 (2018).
- 7 3. Yoo, S., Mittelstein, D. R., Hurt, R. C., Lacroix, J. & Shapiro, M. G. Focused ultrasound  
8 excites cortical neurons via mechanosensitive calcium accumulation and ion channel  
9 amplification. *Nat. Commun.* **13**, 493 (2022).
- 10 4. Chu, Y.-C., Lim, J., Chien, A., Chen, C.-C. & Wang, J.-L. Activation of Mechanosensitive  
11 Ion Channels by Ultrasound. *Ultrasound Med. Biol.* **48**, 1981–1994 (2022).
- 12 5. Folloni, D. *et al.* Ultrasound modulation of macaque prefrontal cortex selectively alters  
13 credit assignment–related activity and behavior. *Sci. Adv.* **7**, 6–10 (2021).
- 14 6. Fouragnan, E. F. *et al.* The macaque anterior cingulate cortex translates counterfactual  
15 choice value into actual behavioral change. *Nat. Neurosci.* **22**, 797–808 (2019).
- 16 7. Folloni, D. *et al.* Manipulation of Subcortical and Deep Cortical Activity in the Primate  
17 Brain Using Transcranial Focused Ultrasound Stimulation. *Neuron* **101**, 1109–1116.e5  
18 (2019).
- 19 8. Verhagen, L. *et al.* Offline impact of transcranial focused ultrasound on cortical  
20 activation in primates. *Elife* **8**, 1–28 (2019).
- 21 9. Sanguinetti, J. L. *et al.* Transcranial Focused Ultrasound to the Right Prefrontal Cortex  
22 Improves Mood and Alters Functional Connectivity in Humans. *Front. Hum. Neurosci.*  
23 **14**, 1–13 (2020).
- 24 10. Cain, J. A. *et al.* Real time and delayed effects of subcortical low intensity focused  
25 ultrasound. *Sci. Rep.* **11**, 1–14 (2021).
- 26 11. Dyke, K. *et al.* Comparing GABA-dependent physiological measures of inhibition with  
27 proton magnetic resonance spectroscopy measurement of GABA using ultra-high-field

- 1 MRI. *Neuroimage* **152**, 360–370 (2017).
- 2 12. Cuypers, K. & Marsman, A. Transcranial magnetic stimulation and magnetic resonance  
3 spectroscopy: Opportunities for a bimodal approach in human neuroscience.  
4 *Neuroimage* **224**, 117394 (2021).
- 5 13. Stagg, C. J., Bachtiar, V. & Johansen-Berg, H. What are we measuring with GABA  
6 Magnetic Resonance Spectroscopy? *Commun. Integr. Biol.* **4**, 573–575 (2011).
- 7 14. Yang, P. S. *et al.* Transcranial Focused Ultrasound to the Thalamus Is Associated with  
8 Reduced Extracellular GABA Levels in Rats. *Neuropsychobiology* **65**, 153–160 (2012).
- 9 15. Seeley, W. W. The Salience Network: A Neural System for Perceiving and Responding  
10 to Homeostatic Demands. *J. Neurosci.* **39**, 9878–9882 (2019).
- 11 16. Raichle, M. E. *et al.* A default mode of brain function. *Proc. Natl. Acad. Sci.* **98**, 676–  
12 682 (2001).
- 13 17. Menon, V. Large-scale brain networks and psychopathology: a unifying triple network  
14 model. *Trends Cogn. Sci.* **15**, 483–506 (2011).
- 15 18. Zeng, K. *et al.* Induction of Human Motor Cortex Plasticity by Theta Burst Transcranial  
16 Ultrasound Stimulation. *Ann. Neurol.* 1–15 (2021) doi:10.1002/ana.26294.
- 17 19. Legon, W., Ai, L., Bansal, P. & Mueller, J. K. Neuromodulation with single-element  
18 transcranial focused ultrasound in human thalamus. *Hum. Brain Mapp.* **39**, 1995–2006  
19 (2018).
- 20 20. Allen, C. P. G. *et al.* Enhanced awareness followed reversible inhibition of human visual  
21 cortex: A combined TMS, MRS and MEG study. *PLoS One* **9**, e100350 (2014).
- 22 21. Stagg, C. J. *et al.* Neurochemical effects of theta burst stimulation as assessed by  
23 magnetic resonance spectroscopy. *J. Neurophysiol.* **101**, 2872–2877 (2009).
- 24 22. Iwabuchi, S. J. *et al.* Targeted transcranial theta-burst stimulation alters fronto-insular  
25 network and prefrontal GABA. *Neuroimage* **146**, 395–403 (2017).
- 26 23. Vidal-Piñeiro, D. *et al.* Neurochemical Modulation in Posteromedial Default-mode  
27 Network Cortex Induced by Transcranial Magnetic Stimulation. *Brain Stimul.* **8**, 937–  
28 944 (2015).

- 1 24. Bachtiar, V., Near, J., Johansen-Berg, H. & Stagg, C. J. Modulation of GABA and  
2 resting state functional connectivity by transcranial direct current stimulation. *Elife* **4**, 1–  
3 9 (2015).
- 4 25. Lee, W. *et al.* Transcranial focused ultrasound stimulation of human primary visual  
5 cortex. *Sci. Rep.* **6**, 1–12 (2016).
- 6 26. Ai, L., Bansal, P., Mueller, J. K. & Legon, W. Effects of transcranial focused ultrasound  
7 on human primary motor cortex using 7T fMRI: a pilot study. *BMC Neurosci.* **19**, 56  
8 (2018).
- 9 27. Bradley, C., Nydam, A. S., Dux, P. E. & Mattingley, J. B. State-dependent effects of  
10 neural stimulation on brain function and cognition. *Nat. Rev. Neurosci.* (2022)  
11 doi:10.1038/s41583-022-00598-1.
- 12 28. Prieto, M. L., Firouzi, K., Khuri-Yakub, B. T., Madison, D. V. & Maduke, M. Spike  
13 frequency–dependent inhibition and excitation of neural activity by high-frequency  
14 ultrasound. *J. Gen. Physiol.* **152**, (2020).
- 15 29. Yang, P. *et al.* Bidirectional and state-dependent modulation of brain activity by  
16 transcranial focused ultrasound in non-human primates. *Brain Stimul.* **14**, 261–272  
17 (2021).
- 18 30. Amiez, C., Wilson, C. R. E. & Procyk, E. Variations of cingulate sulcal organization and  
19 link with cognitive performance. *Sci. Rep.* **8**, 13988 (2018).
- 20 31. Uhlén, M. *et al.* Tissue-based map of the human proteome. *Science (80-. )*. **347**, (2015).
- 21 32. Maddock, R. J., Caton, M. D. & Ragland, J. D. Estimating glutamate and Glx from  
22 GABA-optimized MEGA-PRESS: Off-resonance but not difference spectra values  
23 correspond to PRESS values. *Psychiatry Res. - Neuroimaging* **279**, 22–30 (2018).
- 24 33. Mescher, M., Merkle, H., Kirsch, J., Garwood, M. & Gruetter, R. Simultaneous in vivo  
25 spectral editing and water suppression. *NMR Biomed.* **11**, 266–272 (1998).
- 26 34. Treeby, B. E. & Cox, B. T. k-Wave: MATLAB toolbox for the simulation and  
27 reconstruction of photoacoustic wave fields. *J. Biomed. Opt.* **15**, 021314 (2010).
- 28 35. Wise, E. S., Cox, B. T., Jaros, J. & Treeby, B. E. Representing arbitrary acoustic source

- 1 and sensor distributions in Fourier collocation methods. *J. Acoust. Soc. Am.* **146**, 278–  
2 288 (2019).
- 3 36. Yaakub, S. N. *et al.* Pseudo-CTs from T1-weighted MRI for planning of low-intensity  
4 transcranial focused ultrasound neuromodulation: An open-source tool. *Brain Stimul.*  
5 109181 (2023) doi:10.1016/j.brs.2023.01.838.
- 6 37. Yaakub, S. N. MR-to-pCT for TUS acoustic simulations (Version 1.0.0). (2022)  
7 doi:10.5281/zenodo.7110246.
- 8 38. Marsac, L. *et al.* Ex vivo optimisation of a heterogeneous speed of sound model of the  
9 human skull for non-invasive transcranial focused ultrasound at 1 MHz. *Int. J. Hyperth.*  
10 **33**, 635–645 (2017).
- 11 39. Mueller, J. K., Ai, L., Bansal, P. & Legon, W. Numerical evaluation of the skull for human  
12 neuromodulation with transcranial focused ultrasound. *J. Neural Eng.* **14**, aa843e  
13 (2017).
- 14 40. Yaakub, S. N. *et al.* Pseudo-CTs from T1-weighted MRI for planning of low-intensity  
15 transcranial focused ultrasound neuromodulation: an open-source tool. *arXiv Prepr.*  
16 (2022).
- 17 41. Yaakub, S. N. BRIC\_TUS\_Simulation\_Tools (Version 1.0.0). (2022)  
18 doi:10.5281/zenodo.7110252.
- 19 42. Edden, R. A. E., Puts, N. A. J., Harris, A. D., Barker, P. B. & Evans, C. J. Gannet: A  
20 batch-processing tool for the quantitative analysis of gamma-aminobutyric acid-edited  
21 MR spectroscopy spectra. *J. Magn. Reson. Imaging* **40**, 1445–1452 (2014).
- 22 43. Near, J. *et al.* Frequency and phase drift correction of magnetic resonance  
23 spectroscopy data by spectral registration in the time domain. *Magn. Reson. Med.* **73**,  
24 44–50 (2015).
- 25 44. Ashburner, J. & Friston, K. J. Unified segmentation. *Neuroimage* **26**, 839–851 (2005).
- 26 45. Harris, A. D., Puts, N. A. J. & Edden, R. A. E. Tissue correction for GABA-edited MRS:  
27 Considerations of voxel composition, tissue segmentation, and tissue relaxations. *J.*  
28 *Magn. Reson. Imaging* **42**, 1431–1440 (2015).

1 46. Beckmann, C., Mackay, C., Filippini, N. & Smith, S. Group comparison of resting-state  
2 FMRI data using multi-subject ICA and dual regression. *Neuroimage* **47**, S148 (2009).

3

4

### 5 **Acknowledgements**

6 The authors thank Ms Sarah Shahrin for assistance with uploading data supporting this work  
7 to the Open Science Framework, all study participants for taking part in the study, and  
8 members of the Fouragnan lab for helpful discussions. This research was supported by a  
9 UKRI Medical Research Council Future Leaders Fellowship grant MR/T023007/1 (to E.F.F.).  
10 Scanning for this study was supported by the Brain Research & Imaging Centre (BRIC) Proof  
11 of Concept Support funding (to S.N.Y. and E.F.F.).

12

### 13 **Author contributions**

14 S.N.Y and E.F.F. conceived this research and designed the study. L.V., C.S., and S.H.  
15 contributed to the study design and advised on data quality and analysis. J.R. and S.N.Y.  
16 planned and tested the imaging sequences. S.N.Y., T.A.W., and E.F.F. conducted the study  
17 and analysed the data. S.N.Y. and E.F.F. wrote the manuscript with input from all authors. All  
18 authors reviewed the final manuscript.

19

### 20 **Competing interests**

21 The authors have no competing interests to declare.
